# Supplementary material for: High-dose vitamin D versus placebo to prevent complications in COVID-19 patients: Multicentre randomized controlled clinical trial
Source: PubMed Central journal article supplement (PMC9140264; doi:10.1371/journal.pone.0267918), 2022-05-27
Supplement: pone.0267918.s003.pdf [file pone.0267918.s003.pdf]

**Guide for FiO<sub>2</sub> estimation among participants with oxygen supplementation in whom a temporary interruption of the supplementation is judged inappropriate.**

| <b>Administration device</b> | <b>FiO<sub>2</sub> (Liters)</b> |
|------------------------------|---------------------------------|
| <b>Nasal canulae</b>         | 0.24-0.28 (Max 5 lts)           |
| <b>Venturi Mask</b>          | 0.24 (3 lts)                    |
|                              | 0.35 (8 lts)                    |
|                              | 0.40 (10 lts)                   |
|                              | 0.50 (12 lts)                   |
| <b>Reservoir mask</b>        | 0.55 (6 lts)                    |
|                              | 0.60 (7 lts)                    |
|                              | 0.70 (8 lts)                    |
|                              | 0.80 (9 lts)                    |
|                              | 0.90-0.99 (10-15 lts)           |
