# Supplementary material for: High-dose vitamin D versus placebo to prevent complications in COVID-19 patients: Multicentre randomized controlled clinical trial
Source: PubMed Central journal article supplement (PMC9140264; doi:10.1371/journal.pone.0267918), 2022-05-27
Supplement: pone.0267918.s004.pdf [file pone.0267918.s004.pdf]

## Supporting information file 2

Sites, Principal investigators and number of recruited participants in the The CholecAlcifeRol to improvE the outcomes of patients with COVID-19 (CARED) trial.

Site. Principal investigator, (n):

**Hospital de Infecciosas Francisco Javier Muñiz, Ciudad Autónoma de Buenos Aires, Argentina.** Milagro Sanchez Cunto (n=39).

**Hospital General de Agudos Dr. Enrique Tornú, Ciudad Autónoma de Buenos Aires, Argentina.** Diego Brosio (n=32).

**Clínica Santa Isabel, Ciudad Autónoma de Buenos Aires, Argentina.** Fernando Ross (=30).

**Hospital General de Agudos Dr. Cosme Argerich, Ciudad Autónoma de Buenos Aires, Argentina.** Marcelo Zylberman (n=20).

**Hospital General de Agudos Dr. Teodoro Álvarez, Ciudad Autónoma de Buenos Aires, Argentina.** Daniel Emilio López (n=18).

**Hospital General de Agudos Dr. Juan A. Fernández, Ciudad Autónoma de Buenos Aires, Argentina.** Cecilia Luna Hisano (n=13).

**Hospital de Alta Complejidad en Red El Cruce - Néstor Kirchner, Florencio Varela, Buenos Aires, Argentina.** Sebastián Maristany Batisda (n=13).

**Hospital General de Agudos Parmenio Piñero, Ciudad Autónoma de Buenos Aires, Argentina.** Gabriela Pace (n=11).

**Hospital Luis Lagomaggiore, Mendoza, Mendoza, Argentina.** Adrián Salvatore (n=8).

**Sanatorio Güemes, Ciudad Autónoma de Buenos Aires, Argentina.** Jimena Fernanda Hogrefe (n=6).

**Hospital Regional Antonio J. Scaravelli, Tunuyán, Mendoza, Argentina.** Marcela Turela (n=6).

**Sanatorio Allende, Sede Cerro, Córdoba, Córdoba, Argentina.** Andrés Gaido (n=5).

**Hospital Zonal General de Agudos "Dr. Isidoro Iriarte, Quilmes, Buenos Aires, Argentina.** Beatriz Rodera (n=5).

**Hospital Interzonal Especializado en Agudos y Crónicos. Neuropsiquiátrico Dr. Alejandro Korn, Melchor Romero, Buenos Aires, Argentina.** Elizabeth Banega (n=4).

**Sanatorio Allende Nueva Córdoba, Córdoba, Córdoba, Argentina.** María Eugenia Iglesias (n=4).

**Hospital Modular de Florencio Varela, Florencio Varela, Buenos Aires, Argentina.**

Mariela Rzepeski (n=3).

**Hospital El Carmen, Godoy Cruz, Mendoza, Argentina.** Juan Manuel Gomez Portillo

(n=1).
